1 **RESEARCH ARTICLE**

2  
3  
4 **ROLE OF OLEOYLETHANOLAMIDE**  
5 **AS A FEEDING REGULATOR IN GOLDFISH**  
6

7  
8 Ana B. Tinoco<sup>1</sup>, Andrea Armirotti<sup>2</sup>, Esther Isorna<sup>1</sup>, María J. Delgado<sup>1</sup>,  
9 Daniele Piomelli<sup>2</sup>, Nuria de Pedro<sup>\*1</sup>.

10  
11  
12 <sup>1</sup>Departamento de Fisiología (Fisiología Animal II). Facultad de Biología. Universidad  
13 Complutense de Madrid. 28040 Madrid, Spain, <sup>2</sup>Department of Drug Discovery and  
14 Development, Istituto Italiano di Tecnologia, 16163 Genoa, Italy.

15 \*Author for correspondence (ndepedro@ucm.es)  
16

## SUMMARY

17  
18  
19  
20  
21  
22  
23  
24  
25  
26  
27  
28  
29  
30  
31  
32  
33  
34  
35  
36  
37  
38  
39  
40  
41  
42

Oleoylethanolamide (OEA) is a bioactive lipid mediator, produced in the intestine and other tissues, which is involved in energy balance regulation in mammals, modulating feeding and lipid metabolism. The purpose of the present study was to investigate the presence and possible role of OEA on feeding regulation in goldfish (*Carassius auratus* Linnaeus 1758). We assessed whether goldfish peripheral tissues and brain contain OEA and their regulation by nutritional status. OEA was detected in all studied tissues (liver, intestinal bulb, proximal intestine, muscle, hypothalamus, telencephalon and brainstem). Food deprivation (48-h) reduced intestinal OEA levels and increased upon re-feeding, suggesting that this compound may be involved in the short-term regulation of food intake in goldfish, as a satiety factor. Next, the effects of acute intraperitoneal administration of OEA on feeding, swimming and plasma levels of glucose and triglycerides were analyzed. Food intake, swimming activity and circulating triglyceride levels were reduced by OEA 2 h post-injection. Finally, the possible interplay among OEA and other feeding regulators (leptin, cholecystokinin, ghrelin, neuropeptide Y, orexin and monoamines) was investigated. OEA actions on energy homeostasis in goldfish could be mediated, at least in part, through interactions with ghrelin and serotonergic system, since OEA treatment reduced ghrelin expression in the intestinal bulb, and increased serotonergic activity in the telencephalon. In summary, our results indicate for the first time in fish that OEA could be involved in the regulation of feeding, swimming and lipid metabolism, suggesting a high conservation of OEA actions in energy balance throughout vertebrate evolution.

Key words: Oleoylethanolamide, food intake, locomotor activity, feeding regulators triglycerides, goldfish.

43  
44  
45  
46  
47  
48  
49  
50  
51  
52  
53  
54  
55  
56  
57  
58  
59  
60  
61  
62  
63  
64  
65  
66  
67  
68  
69  
70  
71  
72  
73  
74  
75  
76  
77  
78  
79

## INTRODUCTION

Energy homeostasis in animals is tightly regulated by a complex network of signals adjusting food intake to satisfy metabolic and nutritional requirements. The gastrointestinal tract is involved in the feeding regulation in vertebrates through both neuronal and humoral mechanisms. Among these peripheral signals originated in the gastrointestinal tract, several studies in mammals have shown that lipid-derived messengers such as oleoylethanolamide (OEA) can play a significant role in the regulation of energy balance (Lo Verme et al., 2005; Thabuis et al., 2008; Piomelli, 2013). OEA is a fatty acid ethanolamide (FAE), structural analogue of the endocannabinoid arachidonylethanolamide (anandamide) but does not activate the cannabinoid receptors (Rodríguez de Fonseca et al., 2001). This FAE acts as an endogenous ligand for peroxisome proliferator-activated receptor alpha (PPAR- $\alpha$ : Rodríguez de Fonseca et al., 2001; Fu et al., 2003). In addition to binding to this nuclear receptor, its effects may also be mediated at least in part by the transient receptor potential vanilloid subtype 1 (TRPV1: Ahern, 2003; Almasi et al., 2008) and an orphan G-protein coupled receptor (GPR119: Overton et al., 2006).

OEA has been detected in different peripheral tissues and brain in mammals (Fu et al., 2007; Izzo et al., 2010). Nutrient status regulates OEA mobilization in a tissue-specific manner. In the small intestine, OEA levels decrease during food deprivation and increase upon re-feeding in rat (Rodríguez de Fonseca et al., 2001; Petersen et al., 2006) and mice (Fu et al., 2007). A feeding-induced OEA mobilization in small intestine of the Burmese python (*Python molurus* Linnaeus 1758) has also been described (Astarita et al., 2006a). By contrast, OEA levels increase in liver, pancreas and fat in response to fasting, and no changes were observed in other peripheral tissues (stomach, colon, lung, heart, muscle and kidney) or in brain structures (brainstem, hypothalamus, cerebellum, cortex, thalamus and striatum) in rats (Fu et al., 2007; Izzo et al., 2010). The periprandial fluctuations of OEA found in small intestine suggest that this lipid amide may contribute to the regulation of feeding behavior, possibly acting as a satiety signal. Pharmacological studies in rodents support this idea, since systemic administration of OEA causes a dose- and time-dependent suppression of food intake by prolonging the interval between successive meals (Rodríguez de Fonseca et al., 2001; Fu et al., 2003; Gaetani et al., 2003; Cani et al., 2004; Nielsen et al., 2004). This response is not due to stress, malaise or aversion, although the anorectic effect of OEA is accompanied by a suppression of locomotor activity in mammals (Rodríguez de Fonseca et al., 2001; Proulx et al., 2005). In rats, OEA injection was followed by reductions in ambulation and in spontaneous activity in the open field and by increase in the time that rats pushed their abdomen against the floor with splayed hindlimbs (Proulx et al., 2005). Nevertheless, it has been suggested that OEA modulates feeding and locomotion through distinct mechanisms, because the anorectic action, but not its effect on movement, was abrogated after capsaicin treatment (Rodríguez de Fonseca et al., 2001).

80           The molecular mechanisms involved in the anorectic effect of OEA have been partially  
81 elucidated in mammals. It is known that OEA-induced hypophagia is mediated by the  
82 stimulation of vagal sensory nerves that in turn stimulate the brainstem and hypothalamus  
83 (Rodríguez de Fonseca et al., 2001; Wang et al., 2005; Fu et al., 2011). Anorectic actions of  
84 OEA can be mediated through the modulation of central and peripheral signals involved in  
85 feeding regulation. It has been described that this FAE suppresses feeding by activating  
86 hypothalamic oxytocin transmission (Gaetani et al., 2010; Romano et al., 2013). Moreover,  
87 interactions between OEA and hypothalamic monoamines and cocaine- and amphetamine-  
88 regulated transcript (CART) has also been suggested (Serrano et al., 2011). At the peripheral  
89 level, some gastrointestinal neuropeptides are modified by OEA administration, although  
90 contradictory data have been published in rats. On one hand, reductions in gut peptides, such as  
91 peptide YY and ghrelin, have been described after OEA administration (Cani et al., 2004;  
92 Serrano et al., 2011). On the other hand, Proulx et al. (2005) reported that OEA reduces food  
93 intake without causing peripheral changes in several gastrointestinal peptides, included peptide  
94 YY and ghrelin.

95           In addition to its short-term effects on feeding, OEA has also been implicated in the  
96 control of body weight and lipid metabolism. Subchronic (1 week) and chronic (2 or more  
97 weeks) administration of this FAE decreased food intake accompanied by a marked inhibition  
98 of body mass gain in rodents (Rodríguez de Fonseca et al., 2001; Fu et al., 2003; Guzmán et al.,  
99 2004; Fu et al., 2005). It has been proposed that the effect of OEA on body weight is not only  
100 due to the feeding decrease, but also to a direct effect on lipid metabolism (Lo Verme et al.,  
101 2005). Specifically, OEA promotes lipolysis and inhibits lipogenesis in important metabolic  
102 tissues such as liver, adipose tissue, muscle and gut (Thabuis et al., 2008; Pavón et al., 2010).

103           Accumulating evidence indicates that basic mechanisms controlling feeding behavior  
104 are generally conserved among vertebrates. Fish are a valuable experimental model because  
105 they show a remarkable diversity that makes them attractive for the study of the evolution of  
106 feeding regulation systems in vertebrates (Hoskins and Volkoff, 2012). Like other vertebrates,  
107 food intake in fish is regulated by a complex interplay among hormones, neuropeptides and  
108 monoaminergic systems, acting at central and peripheral level. Goldfish (*Carassius auratus*  
109 Linnaeus 1758) is one of the most studied teleost species regarding to feeding regulation  
110 (Volkoff et al., 2009). Neuropeptide Y (NPY), orexins and ghrelin are examples of powerful  
111 orexigenic factors in this species, whereas cholecystokinin (CCK) and leptin act as anorexic  
112 signals (De Pedro and Björnsson, 2001; Volkoff et al., 2009). Dopamine (DA) and serotonin (5-  
113 HT) systems have been found to inhibit food intake, while noradrenaline (NA) stimulates it (De  
114 Pedro et al., 1998a; De Pedro et al., 1998b). Moreover, interactions between monoaminergic  
115 systems and other feeding regulators have been previously reported in goldfish (De Pedro et al.,  
116 1998a; De Pedro et al., 2006; De Pedro et al., 2008).

117 The involvement of FAEs in the control of food intake in fish was reported for the first  
118 time by Valenti et al. (2005). They demonstrated that the goldfish brain contains the  
119 cannabinoid CB<sub>1</sub> receptor, the endocannabinoids anandamide and 2-arachidonoylglycerol, as  
120 well as an enzymatic activity similar to the mammalian FAAH (fatty acid amide hydrolase).  
121 Intraperitoneal (IP) administration of anandamide stimulated food intake at low doses in this  
122 species. In agreement with the orexigenic role of anandamide, fasting increased its levels in the  
123 telencephalon. Similar results were observed in the sea bream *Sparus aurata* Linnaeus 1758  
124 (Piccinetti et al., 2010), with brain anandamide and 2-arachidonoylglycerol raised by 24-h of  
125 food deprivation, and a food intake increase induced by anandamide administration. However,  
126 to date, nothing is known about whether other FAEs, as OEA can be involved in food intake  
127 regulation in fish. Since FAEs, particularly OEA, have been linked to diet and that dietary lipids  
128 reduce feeding (Librán-Pérez et al., 2012; Librán-Pérez et al., 2014), this FAE might have an  
129 important role in regulation of feeding and body composition in fish, valuable information for  
130 fields such as aquaculture.

131 The present study was aimed to investigate the presence and possible role of OEA on  
132 food intake in fish, using the cyprinid *Carassius auratus* as experimental model. First, we  
133 assessed whether goldfish peripheral tissues and brain contain OEA and whether this compound  
134 is regulated by the nutritional status. Thus, OEA levels in liver, intestinal bulb, proximal  
135 intestine, muscle, hypothalamus, telencephalon and brainstem of goldfish, fed or following 48-h  
136 of the food deprivation, with or without re-feeding, were measured. Next, we analyzed the  
137 effects of OEA acute administration on food intake, locomotor activity and plasma glucose and  
138 triglycerides in this species. Finally, we studied the possible interplay among this FAE and  
139 some known feeding regulators in this teleost. With this objective, gene expression of peripheral  
140 (leptin, CCK and ghrelin) and central (leptin, NPY and orexin) signals and brain activity of  
141 monoaminergic systems were analyzed after OEA administration under two feeding conditions:  
142 fed and 24-h food-deprived goldfish.

143

144

## RESULTS

145

### Experiment 1: Effects of fasting and feeding on OEA content

146

147

148

149

150

151

152

153

Endogenous OEA was detected in all tissues studied of *C. auratus*, both central and peripheral. The OEA content in the intestinal bulb and proximal intestine were almost 5 and 3 times higher than the values observed in muscle and liver, respectively (Fig. 1). In the brain, the highest OEA content was observed in brainstem, almost 3 and 6 times higher than hypothalamus and telencephalon, respectively (Table 1). The OEA levels in brainstem were comparable to those found in the gastrointestinal tract.

Figure 1 shows the OEA content in peripheral tissues in fed, fasted (48-h) and fasted (48-h) + re-fed fish 30 and 120 min after feeding time. OEA levels at 30 min were markedly

154 decreased ( $p < 0.05$ ) after food deprivation for 48-h in intestinal bulb (58 %), proximal intestine  
155 (45 %) and muscle (56 %). OEA levels returned to baseline after re-feeding in the three tissues.  
156 A similar pattern (decreased OEA content in fasted group and back to baseline levels with re-  
157 feeding) was observed at 120 min in these tissues, though without significant statistically  
158 differences (Fig. 1A, B, D). No such changes were observed in liver among the different  
159 experimental groups at any of the studied time intervals (Fig. 1C).

160 The OEA content in brain (hypothalamus, telencephalon and brainstem) under different  
161 feeding conditions is reported in Table 1. Fasting for 48-h increased significantly ( $p < 0.05$ ) the  
162 OEA content in telencephalon compared to fed fish 30 min after food intake, and re-feeding did  
163 not cause a return to baseline levels. No such differences were observed in hypothalamus and  
164 brainstem at any sampling time analyzed (30 and 120 min).

165

### 166 **Experiment 2: Effects of OEA on food intake and locomotor activity**

167 Figure 2 (upper panel) shows food intake during discrete and cumulative intervals after  
168 acute IP injection of either vehicle or OEA at doses of 5  $\mu\text{g/g}$  body weight (b.w.) in goldfish.  
169 Food intake was significantly reduced compared to the control group during the 0-2 h interval ( $p$   
170  $< 0.001$ ; Fig. 2A), but not during the discrete interval 2-8 h (Fig. 2B). Cumulative food intake 8  
171 h after injections was significantly decreased ( $p < 0.05$ ; Fig. 2C) in OEA-treated respect to  
172 control fish. These reductions were around 72% at 2 h, and 29% at 8 h after the OEA treatment.

173 The IP administration of OEA (5  $\mu\text{g/g}$  b.w.) significantly decreased swimming activity  
174 (around 35%) 2 h post-injection ( $p < 0.05$ ; Fig. 2D). A similar trend in decreased swimming was  
175 observed during 2-8 h interval (36%; Fig. 2E) and 0-8 h interval (31%, Fig. 2F), although this  
176 reduction in locomotor activity was not statistically significant.

177

### 178 **Experiment 3: Effects of OEA on plasma metabolites, feeding regulators** 179 **gene expression and monoaminergic system**

180 Plasma triglyceride levels were significantly reduced 2 h after OEA IP treatment (5  $\mu\text{g/g}$   
181 b.w.) under two feeding conditions tested: fasted (24-h) and fed ( $p < 0.005$ ; Fig. 3A). A trend to  
182 higher plasma triglyceride levels was observed in fed fish compared to 24-h food-deprived  
183 animals. There were no significant differences in glycaemia in fish treated with OEA relative to  
184 the control group (Fig. 3B). Plasma glucose levels were lower in 24-h fasted fish (both control  
185 and OEA-treated) than in fed fish 2 h post-feeding ( $p < 0.005$ ). There was not interaction  
186 between the treatment (vehicle or OEA injection) and feeding conditions (fasted or fed) in both  
187 metabolites studied.

188 Figure 4 summarizes results of OEA treatment on gene expression of peripheral feeding  
189 regulators. The two-way ANOVA pointed an interaction between treatment and feeding  
190 conditions ( $p < 0.05$ ) in ghrelin (*gGHRL*) expression in goldfish intestinal bulb. OEA IP

191 treatment reduced *gGHRL* mRNA levels in goldfish intestinal bulb 2 h post-injection in fed fish,  
192 but not in 24h-fasted fish ( $p < 0.05$ ; Fig. 4A). The expression of goldfish CCK (*gCCK*) in the  
193 intestinal bulb (Fig. 4B) and goldfish leptin-aI (*gLep-aI*) in the liver (Fig. 4C) was not modified  
194 by OEA treatment and/or different feeding conditions in any of the studied groups.

195 Analyzing the effects of peripheral OEA treatment on central feeding regulators,  
196 significant differences were not found in the expression of hypothalamic goldfish leptins (*gLep-*  
197 *aI* and *gLep-aII*), goldfish orexin (*gOrexin*) and goldfish NPY (*gNPY*) 2 h post-injections in  
198 both fed and 24h-fasted fish (Table 2).

199 Table 3 shows the hypothalamic and telencephalic contents of monoamines (NA, DA  
200 and 5-HT) and their metabolites (3,4-dihydroxyphenylacetic acid, DOPAC and 5-hydroxyindole  
201 acetic acid, 5-HIAA) as well as the monoaminergic turnovers, DOPAC/DA and 5-HIAA/5-HT,  
202 after IP administration of vehicle or OEA (5  $\mu\text{g/g}$  b.w.) in fasted and fed goldfish 2 h post-  
203 injection. Feeding conditions modified the hypothalamic NA content regardless of treatment  
204 (vehicle or OEA injection), with the highest levels in fed fish compared to 24-h fasted fish ( $p <$   
205  $0.05$ ; Table 3). Any differences by OEA treatment or feeding conditions were found in the  
206 contents of monoamines (DA and 5-HT) and their main oxidative metabolites (DOPAC and 5-  
207 HIAA), and the DOPAC/DA and 5-HIAA/5-HT ratios in goldfish hypothalamus (Table 3). In  
208 the telencephalon, it was observed a significant ( $p < 0.05$ ) effect of feeding conditions in the NA  
209 and 5-HIAA content, and in the 5-HIAA/5-HT ratio, with lower values in 24-h fasted fish  
210 compared to fed fish. The NA content and 5-HIAA/5-HT ratio 2-h post-injection were  
211 significantly increased ( $p < 0.05$  and  $0.005$ , respectively) by OEA treatment in both fed and  
212 fasted goldfish. The DA and 5-HT hypothalamic content was not significantly modified by  
213 either treatment or feeding condition in any of the studied experimental groups.

214

215

## DISCUSSION

216

217 The present findings indicate for the first time in fish a potential role of OEA as a lipid-  
218 derived satiety factor. The intestinal OEA levels were down-regulated during short-term fasting,  
219 suggesting that this lipid amide could be involved in the short-term regulation of food intake in  
220 goldfish. In support of this hypothesis, IP administration of OEA produced a time-dependent  
221 inhibition of food intake, accompanied by a decrease of locomotor activity and triglyceride  
222 plasma levels. These actions of OEA could be mediated through the modulation of peripheral  
(ghrelin) and central (monoamines) signals.

223

224

### *Regulation of OEA levels by feeding*

225

226 We have reported the presence of endogenous OEA in both peripheral tissues and brain  
227 of goldfish. Gastrointestinal segments (intestinal bulb and proximal intestine) in daily fed  
goldfish showed similar OEA levels to previously reported in equivalent regions in fed rats (Fu

228 et al., 2007). OEA was also found in other peripheral tissues (liver and muscle), as well as in  
229 brain structures (telencephalon, hypothalamus and brainstem), with lower levels in fish than in  
230 rats.

231 Feeding promotes OEA mobilization in the small intestine of studied species, as rats  
232 (Rodríguez de Fonseca et al., 2001; Petersen et al., 2006; Fu et al., 2007), mice (Fu et al., 2007)  
233 and Burmese pythons (Astarita et al., 2006a). Our results also support this hypothesis in fish,  
234 since intestinal OEA content decreased after 48-h of fasting, and subsequently returned to  
235 baseline levels by re-feeding. We cannot ensure an intestinal biosynthesis of this FAE in  
236 goldfish, since we did not measure the enzymatic activities responsible of OEA synthesis.  
237 Similar down regulation of OEA levels has also been observed in goldfish muscle, but not in  
238 rats (Fu et al., 2007), and the possible physiological significance of this response in fish remains  
239 unknown. The time course of changes in OEA levels in intestinal and muscle goldfish indicates  
240 higher levels of this lipid amide at 30 min than at 120 min, suggesting that OEA is a rapid  
241 satiety signal. In fact, the decrease in OEA content by fasting was rapidly reverted by re-feeding  
242 (after 10 min) in rats (Fu et al., 2007). The fact that fasting induces up-regulation of OEA  
243 content in other peripheral tissues, as liver, pancreas, spleen and adipose tissue in rats (Fu et al.,  
244 2007; Izzo et al., 2010), but no in fish liver (present results) agrees with the down regulation of  
245 lipogenesis in liver induced by food deprivation (Pérez-Jiménez et al., 2007) and suggest that  
246 nutrient availability seems regulate OEA mobilization in a tissue-specific manner.

247 In the brain, the existing evidences in rats do not support a major role for OEA, since  
248 there are not fasting/re-feeding-induced changes (Fu et al., 2007; Izzo et al., 2010). Similar  
249 results have been found in goldfish in hypothalamus and brainstem, but not in telencephalon  
250 where fasting increased OEA levels, in disagreement with its anorectic role. Fasting also  
251 increased anandamide levels in goldfish telencephalon (Valenti et al., 2005), but this FAE  
252 increases food intake (Valenti et al., 2005). Thus, this similar response to fasting of OEA and  
253 anandamide does not appear to be in agreement with the opposite effect of these two FAEs. This  
254 conflicting result in goldfish brings about other possible roles of OEA in the telencephalon. In  
255 this sense, other functions of OEA have been described in mammals, as memory consolidation,  
256 stress, sleep-wake cycle, cellular viability and circadian system (for review see Sarro-Ramírez et  
257 al., 2013).

258

### 259 *Effects of OEA on food intake, locomotor activity and plasma metabolites*

260 This is the first report documenting possible actions of OEA in fish. We found that IP-  
261 administered OEA (5 µg/g b.w.) exert an inhibitory effect on food intake 2 and 8 h post-  
262 injection in goldfish. This result is consistent with previous reports in mammals in which  
263 peripheral treatment with OEA was found to reduce food intake at similar dosages (Rodríguez  
264 de Fonseca et al., 2001; Fu et al., 2003; Cani et al., 2004; Nielsen et al., 2004). The fact that the



265 feeding decrease by OEA was observed during the first 2 hours after the injection, but not  
266 during the next discrete interval (2-8 h), suggests that this lipid amide acts at short time in  
267 goldfish. OEA can modify food intake in the first 20 or 30 min post-injection in mammals (Cani  
268 et al., 2004; Serrano et al., 2011). Nevertheless, such early variations of feeding intake by FAEs  
269 can be extended for some hours later, as in the present study. Thus, the OEA-induced decrease  
270 of cumulative food intake observed 8 h post-injection in goldfish would reflect the inhibitory  
271 action of OEA at short time (2 h), which is maintained at least 8 h after the treatment. Moreover,  
272 the hypophagic actions of OEA appear to depend on the feeding state of the animal. In free-  
273 feeding rats, this lipid mediator decreases meal frequency without changes on meal size or post-  
274 meal interval; while OEA simultaneously reduces these three parameters in food-deprived rats  
275 (Gaetani et al., 2003). Our experimental model to study the anorectic effect of OEA utilized 24-  
276 h food-deprived goldfish, indicating that OEA reduces feeding induced by fasting, but it is still  
277 unknown if other feeding behavior parameters, such as latency, post-meal interval or meal  
278 frequency could be modified by OEA in fish. Several lines of evidence in mammals support the  
279 idea that OEA decreases food intake by activating PPAR- $\alpha$  receptor. In summary, mice lacking  
280 PPAR- $\alpha$  do not respond to OEA (Fu et al., 2003); PPAR- $\alpha$  agonists have anorectic actions  
281 similar to OEA (Astarita et al., 2006b); and OEA stimulates the transcription of various PPAR- $\alpha$   
282 target genes (Fu et al., 2003). The existence of the PPAR subtypes ( $\alpha$ ,  $\beta$  and  $\gamma$ ) has been  
283 demonstrated in fish (Mimeault et al., 2006; Zheng et al., 2013; Carmona-Antoñanzas et al.,  
284 2014), but to date it is unknown if these nuclear receptors could be involved in the OEA effects  
285 in these vertebrates. In addition, TRPV1 (transient receptor potential vanilloid type 1) and  
286 GPR119 (orphan G-protein coupled receptor) receptors have been involved in feeding  
287 suppression actions of OEA in rodents (Ahern, 2003; Overton et al., 2006; Almasi et al., 2008),  
288 although genetic removal of either TRPV1 or GPR119 has no effect on OEA-induced  
289 hypophagia (Piomelli, 2013). Molecular studies have also demonstrated the expression of  
290 TRPV1 and GPR119 receptors in fish species (Fredriksson et al., 2003; Gau et al., 2013), but  
291 the physiological roles of these receptors have not yet been elucidated.

292         Considering that the metabolic precursor of OEA is oleic acid, it is important to point  
293 out that central or peripheral administration of oleic acid causes satiety effects in fish, probably  
294 mediated by fatty acid sensing systems through different mechanisms related to fatty acid  
295 metabolism (Librán-Pérez et al., 2012; Librán-Pérez et al., 2014). Thus, it cannot be ruled out  
296 that the OEA mobilization in fish is induced by oleic acid in the intestine, as it has been  
297 suggested in mammals (Piomelli, 2013).

298         Present results suggest that OEA may play a role in the regulation of locomotor activity  
299 in fish, as reported in mammals (Rodríguez de Fonseca et al., 2001; Proulx et al., 2005). In both  
300 vertebrates, the anorectic effect of OEA was accompanied by a significant reduction of  
301 locomotor activity. Rodríguez de Fonseca et al. (2001) suggested that both responses are

302 unrelated because the feeding decrease elicited by OEA was eliminated after selective  
303 degeneration of sensory fibers by capsaicin treatment, but not the reduction on locomotor  
304 activity. The possible interactions of OEA regulation on feeding and swimming activity in fish  
305 have not been studied to date. At least two possibilities could be addressed, on one hand the  
306 anorectic action of OEA might be due the reduction of locomotor behavior induced by this lipid  
307 amide. On the other hand, a decrease in activity might be related with a decrease in searching  
308 behavior, as a direct consequence of the satiety effect of OEA. We cannot conclude for the  
309 independence of these effects, based on the present results, but previous studies in goldfish have  
310 suggested that feeding and locomotor activity can be independently regulated by other anorectic  
311 hormones, such as leptin (Vivas et al., 2011) and melatonin (Azpeleta et al., 2010).

312 A significant decrease in triglyceride plasma levels after OEA injection in goldfish is in  
313 accordance with the general role of peripheral OEA increasing fat utilization in mammals  
314 (Thabuis et al., 2008; Pavón et al., 2010; Piomelli, 2013). Systemic administration of OEA in  
315 rats stimulated lipolysis in adipocytes, decreasing circulating triglycerides and rapidly  
316 increasing the circulating non-esterified fatty acids and glycerol (Guzmán et al., 2004; Fu et al.,  
317 2005). Similar results were observed after incubation of rat adipocytes in the presence of OEA,  
318 suggesting that this lipolytic action of OEA involves the PPAR- $\alpha$  receptor (Guzmán et al.,  
319 2004). Moreover, an enhanced fatty acid oxidation was also found in muscle, heart and liver  
320 cells of rats and mice (Guzmán et al., 2004). As mentioned above, the effects of OEA might be  
321 mediated, at least in part, by oleate and its effects on fatty acid sensing systems (Librán-Pérez et  
322 al., 2012; Librán-Pérez et al., 2014). The reduction in triglycerides does not seem to be due to  
323 food intake reduction induced by OEA, since such effect was not observed in the pair-fed group  
324 in rats (Guzmán et al., 2004). The fact that triglycerides decrease in goldfish also occurred in the  
325 group that not received food after OEA injection support also such hypothesis in fish. All these  
326 findings together suggest that OEA would play an important role on lipid metabolism in  
327 mammals and probably in fish.

328 A 24-h fasting reduced glycaemia in goldfish, as it can be expected (Polakof et al.,  
329 2012), without changes by OEA treatment. Similar results in rats have shown that OEA  
330 administration does not modify blood glucose levels (Guzmán et al., 2004; Fu et al., 2005).  
331 However, some experiments *in vitro* have suggested that OEA can be involved in glucose  
332 metabolism regulation, since it inhibits insulin-stimulated glucose uptake in isolated rat  
333 adipocytes (González-Yanes et al., 2005). This possible inhibitory action of OEA on insulin  
334 actions in fish deserves to be investigated.

335

### 336 *Interplay between OEA and other feeding regulators*

337 The OEA actions on energy homeostasis in goldfish could be mediated by interactions  
338 with ghrelin, since present results show reductions in ghrelin mRNA levels in the intestinal bulb

339 induced by OEA. Ghrelin is a well-known orexigenic signal in fish, that it can also increase  
340 locomotor activity and lipid deposition in some species (Jönsson, 2013). Thus, OEA might  
341 reduce food intake and locomotor activity by decreasing gastrointestinal synthesis of ghrelin.  
342 Taking into consideration that OEA inhibits adipogenesis in mammals, and the adipogenic  
343 effect of ghrelin in mammals and fish (Thabuis et al., 2008; Jönsson, 2013), it is tempting to  
344 speculate that the OEA actions on lipid metabolism could be mediated, at least in part, by a  
345 ghrelin reduction. Decrease in ghrelin expression by OEA was observed only in fed goldfish,  
346 but not in 24-h food-deprived fish, suggesting that OEA-ghrelin interaction could depend on  
347 energy status of animals. This dependence also seems to occur in mammals, although results are  
348 varied. On one hand, the decrease in circulating ghrelin induced by OEA is found in fasted rats,  
349 but not in fed rats (Cani et al., 2004). On the other hand, no changes in plasma ghrelin in fasted  
350 rats have also been reported (Proulx et al., 2005; Serrano et al., 2011). This apparent  
351 discrepancy between present results in fish and previous in mammals might result from species-  
352 specific differences, different physiological conditions (as reproductive stage) and differences in  
353 experimental approaches (quantification of mRNA vs plasma levels, duration of fasting imposed  
354 to the animals, and others).

355 To study if the anorectic effect of OEA implies the modulation of the secretion of other  
356 anorectic signals from gastrointestinal tract in fish, we analyzed expression of the CCK in the  
357 intestinal bulb of goldfish injected with this lipid amide. In the present study OEA did not  
358 modify CCK expression, supporting previous data in mammals that indicate unlikely that CCK  
359 mediates the effects of OEA on food intake (Proulx et al., 2005). In fact, the primary  
360 contribution of OEA to normal feeding is regulating satiety (delaying feeding onset and  
361 prolonging time between meals), while CCK contributes to the process of satiation or meal  
362 termination, reducing meal size (Gaetani et al., 2003).

363 The unaltered hepatic and hypothalamic leptin expression in OEA-injected fish suggests  
364 that the reductions in food intake, locomotor activity and triglycerides induced by this FAE in  
365 goldfish cannot be directly attributed to an activation of leptin, an anorectic signal that also  
366 induces hypoactivity and lipolytic actions in this teleost (Vivas et al., 2011). This independence  
367 of leptin agrees with a previous finding in mammals, where OEA reduces both, feeding and  
368 circulating lipids in obese Zucker rats lacking of functional leptin receptors (Fu et al., 2005).

369 Because the OEA effect is associated with the activation of brain regions involved in the  
370 feeding regulation, in the present study we examined whether peripheral administration of OEA  
371 induced changes in the expression of hypothalamic neuropeptides. There were no changes in the  
372 expression of NPY and orexin, two important orexigenic peptides in goldfish (Volkoff et al.,  
373 2009), by the OEA injection. A previous study in rats (Serrano et al., 2011) demonstrated that  
374 OEA failed to modulate hypothalamic expression of NPY and AgRP (agouti-related protein) in  
375 experimental conditions (fed and 24-h fasted) similar to those of the present study. These data

376 support the hypothesis that these orexigenic peptides in hypothalamus do not play a critical role  
377 in the anorectic effect of OEA in fish and mammals, although interactions between OEA and  
378 other orexigenic and anorexigenic neuropeptides, such as CART and oxytocin (Serrano et al.,  
379 2011; Gaetani et al., 2010), cannot be ruled out.

380 The central neurotransmitters recruited by peripheral OEA to inhibit food intake in rats  
381 have been studied by Serrano et al. (2011). The hypothalamic content of NA and DA increased  
382 after OEA injection, with a decrease in DOPAC/DA and without modifications in serotonergic  
383 system. These effects were found only with the highest dose (20 mg/kg) of OEA, but not with 5  
384 mg/kg. No changes were observed in goldfish hypothalamic monoamines (NA, DA and 5-HT),  
385 metabolites (DOPAC and 5-HIAA) and turnovers (DOPAC/DA and 5-HT/5-HIAA) by OEA  
386 administration. These differences could be the consequence of different experimental  
387 approaches as OEA doses (5 mg/kg in fish vs 20 mg/kg in rats) and time post-injection (2 h in  
388 fish vs 1 h in rats). Keeping in mind that telencephalon is involved in regulation of feeding and  
389 swimming in fish (Lin et al., 2000; Wilson and McLaughlin, 2010), the increases in NA, 5-  
390 HIAA and 5-HIAA/5-HT ratio induced by OEA in this brain region are potentially very  
391 interesting. The fact that these effects of OEA were similar in fed and fasted fish allows us  
392 discard the possibility that drug-induced feeding changes could be the cause of these  
393 monoaminergic neurotransmission alterations. Since serotonin reduces feeding and swimming  
394 activity in fish (De Pedro et al., 1998b; Kuz'mina and Garina, 2013); the inhibitory effect of  
395 OEA on food intake and locomotor activity in goldfish could be mediated by serotonergic  
396 activation. The NA increase in goldfish telencephalon would not explain the OEA anorectic  
397 action, considering that this monoamine stimulates feeding in fish (De Pedro et al., 1998a; De  
398 Pedro et al., 2001). The possible cross-talk between OEA and telencephalic NA could be related  
399 with other functions of OEA. In mammals it has been proposed that OEA facilitates memory  
400 consolidation through noradrenergic activation of the amygdala (Campolongo et al., 2009).  
401 Recent results in rats have suggested that noradrenergic neurons are involved in the circuit  
402 responsible for the activation of hypothalamic oxytocin, which mediates the food intake  
403 inhibition induced by peripheral OEA administration (Romano et al., 2013). The identification  
404 of a functional link between OEA and brain NA is an intriguing question and future studies  
405 should examine all these possible interactions.

406 In conclusion, our results indicate for the first time in fish that OEA may be involved in  
407 the regulation of feeding, swimming and lipid metabolism, suggesting a high conservation of  
408 OEA actions in energy balance throughout vertebrate evolution.

409

410

## MATERIALS AND METHODS

411

### Animals

412 Experiments were performed with goldfish (*Carassius auratus*). Animals were obtained  
413 from a commercial supplier and reared at  $21 \pm 2^\circ\text{C}$  in aquaria (60 l) with a constant flow of  
414 filtered water, under 12 h light:12 h dark photoperiod (lights on at 08:00). The aquaria walls  
415 were covered with opaque paper to minimize external interferences during the experiments. Fish  
416 were fed once daily with a 1% b.w. with commercial dry pellets (32.1% crude protein, 5% crude  
417 fat, 1.9% crude fiber, 5.1% humidity and 6.8% crude ash; Sera Biogram, Heinsberg, Germany)  
418 at 10:00. Animals were maintained under these conditions for at least 15 days prior to the  
419 experimental use.

420 All the fish handling procedures comply with the international standards for the Care  
421 and Use of Laboratory Animals, were approved by the Animal Experiments Committee of the  
422 Complutense University of Madrid and were in accordance with the Guidelines of the European  
423 Union Council (2010/63/EU) for the use of research animals.

424

#### 425 **OEA administration**

426 OEA (Sigma Chemical, Madrid, Spain) was dissolved in 5% Tween 20, 5%  
427 polyethylenglycol (Sigma Chemical, Madrid, Spain), and 90% teleost saline (20 mg  
428  $\text{Na}_2\text{CO}_3/100$  ml of 0.6% NaCl). Fish (24-h food-deprived) were anesthetized in water containing  
429 tricaine methanesulphonate (MS-222, 0.14 g/l; Sigma Chemical, Madrid, Spain). Immediately  
430 after loss of equilibrium, fish were weighed and injected at feeding time (10:00). Goldfish were  
431 not fed for 24 h prior to injections (advisable conditions to test anorexigenic regulators). The IP  
432 injections were performed using 1 ml syringes and 0.3 mm Microlance needles (Lab-Center,  
433 Madrid, Spain), close to the ventral midline posterior to the pelvic fins (De Pedro et al., 2006).  
434 Fish were IP injected with 10  $\mu\text{l}$  vehicle/g b.w. alone (control group) or containing OEA (5  $\mu\text{g/g}$   
435 b.w., experimental group). The OEA dose was chosen based on studies previously reported in  
436 mammals (Cani et al., 2004; Fu et al., 2003; Nielsen et al., 2004; Rodríguez de Fonseca et al.,  
437 2001; Serrano et al., 2011). After the IP injections, fish were transferred to the experimental  
438 aquaria with anesthetic-free water, where swimming activity and equilibrium was recovered  
439 within 1-2 min.

440

#### 441 **Experiment 1: Effects of fasting and feeding on OEA content**

442 Fish ( $12.02 \pm 0.47$  g b.w.) were divided into 3 groups (n = 16 fish/group): control (fish  
443 were fed 1% b.w. at 10:00), fasted (animals were food-deprived for 48-h) and fasted + re-fed  
444 (fish were fasted for 48-h and re-fed 1% b.w. at 10:00). Fish were killed by anesthetic overdose  
445 (MS-222; 0.28 g/l) followed by spinal section 30 and 120 h after feeding time (10:30 and  
446 12:00). Liver, intestinal bulb, proximal intestine (the first centimeter post-intestinal bulb),  
447 muscle and brain (hypothalamus, telencephalon and brainstem) were dissected on ice, immersed  
448 in nitrogen liquid and immediately stored at  $-80^\circ\text{C}$  until posterior analysis. These tissues were

449 chosen in accordance with previous studies in mammals and python (Astarita et al., 2006a; Fu et  
450 al., 2007), and taking into account the central relevance of hypothalamus and telencephalon in  
451 feeding regulation in fish (Volkoff et al., 2009). Tissues were then weighed and homogenized in  
452 a methanol (Thermo Fisher Scientific; Milano, Italy) solution spiked with the deuterated  
453 analogue of OEA ( $[^2\text{H}_4]$ -OEA; Cayman Chemical, Ann Arbor, MI, USA), used as internal  
454 standard (I.S.) and mixed with chloroform (Thermo Fisher Scientific; Milano, Italy) and water  
455 (1:2:1). The FAEs in the samples were fractionated by open-bed silica gel column  
456 chromatography, as previously described (Cadas et al., 1997). Briefly, the lipids extracts were  
457 reconstituted in chloroform and loaded onto small columns packed with silica gel G (60-Å 230–  
458 400 Mesh ASTM; Whatman, Clifton, NJ). FAEs were eluted with a chloroform/methanol 9:1  
459 (vol / vol) solution. Eluates were dried under  $\text{N}_2$  and reconstituted in 0.1 ml of acetonitrile added  
460 with 0.1% of formic acid (Sigma Chemical, Milano, Italy). Samples were then analyzed by LC-  
461 MS / MS on a Xevo-TQ triple quadrupole mass spectrometer coupled with a UPLC  
462 chromatographic system. Standard curves for OEA were prepared in the 1 nM to 10  $\mu\text{M}$  range.  
463 OEA and its deuterated analog were loaded on a reversed phase BEH C18 column (50x2.1 mm  
464 inner diameter, 1.7  $\mu\text{m}$  particle size) operated at 0.5 ml/min flow rate. Analytes were eluted  
465 from the column using a linear gradient of acetonitrile in water (both added with 0.1% formic  
466 acid). The column and the UPLC-MS/MS system were purchased from Waters Inc, Milford,  
467 PA, USA. Quantification of analytes was performed monitoring the following MRM (multiple  
468 reaction monitoring) transitions (parent m/z ->daughter m/z, collision energy eV): OEA 326-  
469 >62, 20;  $[^2\text{H}_4]$ -OEA 330->66, 20). OEA content in the samples was calculated from the analyte  
470 to I.S. peak area ratio and expressed as pmol/mg tissue.

471

### 472 **Experiment 2: Effects of OEA on food intake and locomotor activity**

473 Fish ( $15.67 \pm 0.52$  g b.w.) were divided into 2 groups (n = 16 fish/group) IP injected  
474 with vehicle or OEA (5  $\mu\text{g/g}$  b.w.). Immediately, individual goldfish were placed alone in 5 l  
475 aquaria. Pre-weighed food was supplied in excess (3% b.w.) 10 min after fish were injected, and  
476 remaining food was collected at 2 h. New pre-weighed food (5% b.w.) was added to the aquaria  
477 and remaining food was collected after 8 h post-injection. Food intake was measured during the  
478 discrete intervals 0-2 and 2-8 h, which sum represents the cumulative interval 0-8 h, as  
479 previously described (De Pedro et al., 1998b).

480 Locomotor activity was recorded in groups of 6 fish ( $29.51 \pm 0.54$  g b.w.) in tanks of 60  
481 l (n = 6 tanks/group), after IP injections of vehicle or OEA (5  $\mu\text{g/g}$  b.w.). Swimming was  
482 recorded by using infrared photocells (OMRON E3SAD12, Osaka, Japan) fixed on the aquaria  
483 wall, as previously described by Azpeleta et al. (2010). The activity values registered in each  
484 tank 2 and 8 h after vehicle or OEA injections were expressed as percentage respect to the

485 locomotor activity recorded at the same time periods in the same tank the day prior to the  
486 treatment.

487  
488 **Experiment 3: Effects of OEA on plasma metabolites, feeding regulators**  
489 **gene expression and monoaminergic system**

490 Fish ( $16.98 \pm 0.58$  g b.w.;  $n = 8$  fish/group) were IP injected with vehicle or OEA (5  
491  $\mu\text{g/g}$  b.w.) at scheduled feeding time (10:00), and maintained under 2 feeding conditions: fed  
492 (1% b.w.) or food-deprived (24-h). Two hours after injections, fish were anesthetized and blood  
493 was taken by heparinized syringes from caudal vein. Then, animals were killed by anesthetic  
494 overdose (MS-222; 0.28 g/l) followed by spinal section and tissues sampled. Brain  
495 (hypothalamus and telencephalon) and peripheral tissues (liver and intestinal bulb) were  
496 dissected on ice, immersed in nitrogen liquid and immediately stored at  $-80^\circ\text{C}$  until posterior  
497 analysis. Feeding regulators and tissues studied were chosen considering previous studies in  
498 mammals on interactions between OEA and other feeding signals (Serrano et al., 2011; Gaetani  
499 et al., 2010), the relevance of these compounds in the feeding regulation in fish and their main  
500 sites of synthesis and action in fish (Volkoff et al., 2009).

501 Plasma was obtained after centrifugation (4 min at 6,000 rpm) and stored at  $-80^\circ\text{C}$  until  
502 biochemical analysis. Plasma glucose and triglyceride levels were determined using an  
503 enzymatic/colorimetric method with commercial kits (GOD-POP and GPO-POD, respectively;  
504 Spinreact, Girona, Spain).

505 The mRNA levels of leptin-aI, leptin-aII, NPY and orexin in hypothalamus; leptin-aI in  
506 liver; and CCK and GHRL in intestinal bulb were measured. Feeding regulators gene  
507 expression was quantified by quantitative PCR (qPCR) using the goldfish  $\beta$ -actin as reference  
508 gene (no differences between saline and OEA injected fish were observed). Total RNA was  
509 extracted using Trizol (Sigma Chemical, Madrid, Spain). After DNase treatment (Promega,  
510 Madison, WI, USA), total RNA (from 0.25 to 0.8  $\mu\text{g}$  depending on the tissue) was retro-  
511 transcribed (SuperScript II Reverse Transcriptase; Invitrogen, Carlsbad, CA, USA). Gene  
512 expression analysis was performed in a CFX96™ Real-Time System (Biorad, Hercules, CA,  
513 USA). The qPCR reactions were developed in a 20  $\mu\text{l}$  volume using iTaq™ SYBR® Green  
514 Supermix (Biorad, Hercules, CA, USA). Specific primers (Sigma Chemical, Madrid, Spain;  
515 Table S1) and qPCR conditions employed for  $\beta$ -actin, *gLep-aI* and *gLep-aII* were previously  
516 described by Tinoco et al. (2012). For the other genes qPCR conditions were similar varying the  
517 annealing temperatures:  $60^\circ\text{C}$  (*gCCK*) and  $65^\circ\text{C}$  (*gNPY*, *gOrexin* and *gGHRL*). All samples  
518 were analyzed by duplicate. Calibration curves for each gene were generated with serial  
519 dilutions of cDNA; all curves exhibited slopes close to -3.32 and efficiencies between 95-105  
520 %. Negative controls included replacement of cDNA by water and the use of non-  
521 retrotranscribed total RNA. The specificity of the amplification reactions was confirmed by the

522 melting temperature of qPCR products (measured at the end of all reactions) and by the size in  
523 an agarose gel. The  $\Delta\Delta C_t$  method (Livak and Schmittgen, 2001) was used to determine the  
524 relative expression (fold change).

525 The contents of NA, DA, DOPAC (a major DA metabolite), 5-HT, and 5-HIAA (a  
526 major 5-HT metabolite) in hypothalamus and telencephalon were quantified by HPLC (High-  
527 performance liquid chromatography; Agilent 1100, Madrid, Spain) with coulometric detection  
528 (ESA Coulochem II®, Chelmsford, MA, USA) as previously described (De Pedro et al., 2008).  
529 Briefly, the tissues were sonicated in 100  $\mu$ l of cold perchloric acid (0.3 N; Scharlab, Sentmenat,  
530 Spain) containing 0.4 mM sodium bisulphate and 0.4 mM ethylenediaminetetraacetic acid  
531 disodium salt dihydrate (EDTA; Sigma Chemical, Madrid, Spain). The homogenate was  
532 centrifuged (13,000 rpm for 5 min) and the supernatant was injected into the HPLC system. The  
533 mobile phase (flow rate 1 ml/min) consisted in 10 mM phosphoric acid, 0.1 mM disodium  
534 EDTA, 0.4 mM sodium octanesulphonic acid (Sigma Chemical, Madrid, Spain) and 3% of  
535 acetonitrile (Panreac, Barcelona, Spain), pH 3.1. Separation was performed using a reversed  
536 phase C18 analytical column, 125x4.6 mm internal diameter, 5  $\mu$ m particle size (Teknokroma,  
537 Barcelona, Spain). The oxidation potential was 200 mV and the signal from analytical cell was  
538 recorded with a sensitivity of 20 nA. Acquisition and integration of chromatograms were  
539 performed with the Clarity Chromatography Station software (Micronec, Madrid, Spain).  
540 Protein content was determined by the method of Lowry et al. (1951). The amount of  
541 monoamines in the samples were calculated as the area under peak and expressed as pmol/mg  
542 proteins. Metabolite/monoamine ratios are used as an index of monoaminergic activity.

543

544

#### Statistical analyses

545 Results are expressed as mean  $\pm$  s.e.m. Food intake and swimming activity data were  
546 analyzed by Student's t-test to ascertain statistical differences between controls and OEA treated  
547 fish in each time period. Plasma glucose and triglyceride levels, feeding regulators mRNA and  
548 monoamines content were analyzed by two-way analysis of variance (ANOVA), using  
549 treatment and feeding condition as independent factors. Tukey multiple range test were  
550 performed for multi-group comparisons only for significant interactions. One-way ANOVA  
551 followed by Tukey test was used to evaluate the effects of fasting and feeding effect on OEA  
552 content. When necessary, values were transformed (logarithmic or square root transformation)  
553 to obtain a normal distribution and homogeneity of variances. A Kruskal-Wallis non-  
554 parametric test was used to analyze statistical differences in telencephalic content of DA and  
555 *gNPY* hypothalamic expression. Analyses were conducted using IBM SPSS Statistics 19 (IBM  
556 Corporation, Armonk, NY, USA) and differences were considered statistically significant at  $p <$   
557 0.05.

558



559  
560  
561  
562  
563  
564  
565  
566  
567  
568  
569  
570  
571  
572  
573  
574  
575  
576  
577  
578  
579  
580  
581  
582  
583  
584  
585  
586  
587  
588  
589  
590  
591  
592  
593

## LIST OF SIMBOLS AND ABBREVIATIONS

|                |                                                  |
|----------------|--------------------------------------------------|
| 5-HT           | 5-hydroxytryptamine (serotonin)                  |
| 5-HIAA         | 5-hydroxyindole acetic acid                      |
| b.w.           | Body weight                                      |
| CART           | Cocaine- and amphetamine-regulated transcript    |
| CCK            | Cholecystokinin                                  |
| DA             | Dopamine                                         |
| DOPAC          | 3,4-dihydroxyphenylacetic acid                   |
| FAE            | Fatty acid ethanolamide                          |
| GHRL           | Ghrelin                                          |
| IP             | Intraperitoneal                                  |
| Lep            | Leptin                                           |
| MS-222         | Tricaine methanesulphonate                       |
| NA             | Noradrenaline                                    |
| NPY            | Neuropeptide Y                                   |
| OEA            | Oleylethanolamide                                |
| PPAR- $\alpha$ | Peroxisome proliferator-activated receptor alpha |

## ACKNOWLEDGEMENTS

The authors thank Dr A. Guijarro for valuable suggestions about the subject of this article. Dr N. Realini and Dr M. Dionisi for technical support at the Italian Institute of Technology. PhD students (A. Sánchez-Bretaña and M. Gómez-Boronat) for fish experiment support at the Complutense University of Madrid.

## COMPETING INTEREST

No competing interest declared.

## AUTHOR CONTRIBUTIONS

A.B.T. and N.D.P. conceived and designed the experiments, and interpreted the findings. E.I. and M.J.D. collected and analyzed the data from experiments carried out in Complutense University of Madrid. A.A. and D.P. collected and analyzed the data from experiments carried out in Italian Institute of Technology. All authors drafted and revised the article.

## FUNDING

594 This research was supported by the Spanish Ministry of Economy and Competitiveness  
595 project [MINECO; AGL2010-22247-C03-02]. A.B.T. was funded by FPI grant [BES-2008-  
596 008638] of Spanish Government.

597

598

## REFERENCES

599 **Ahern, G. P.** (2003). Activation of TRPV1 by the satiety factor oleoylethanolamide. *J. Biol.*  
600 *Chem.* **278**, 30429-30434.

601 **Almasi, R., Szoke, E., Bolcskei, K., Varga, A., Riedl, Z., Sandor, Z., Szolcsanyi, J. and**  
602 **Petho, G.** (2008). Actions of 3-methyl-N-oleoyldopamine, 4-methyl-N-oleoyldopamine and N-  
603 oleoylethanolamide on the rat TRPV1 receptor in vitro and in vivo. *Life Sci.* **82**, 644-651.

604 **Astarita, G., Rourke, B. C., Andersen, J. B., Fu, J., Kim, J. H., Bennett, A. F., Hicks, J. W.**  
605 **and Piomelli, D.** (2006a). Postprandial increase of oleoylethanolamide mobilization in small  
606 intestine of the Burmese python (*Python molurus*). *Am. J. Physiol. Regul. Integr. Comp.*  
607 *Physiol.* **290**, R1407-R1412.

608 **Astarita, G., Di Giacomo, B., Gaetani, S., Oveisi, F., Compton, T. R., Rivara, S., Tarzia,**  
609 **G., Mor, M. and Piomelli, D.** (2006b). Pharmacological characterization of hydrolysis-resistant  
610 analogs of oleoylethanolamide with potent anorexiatic properties. *The Journal of pharmacology*  
611 *and experimental therapeutics* **318**, 563-570.

612 **Azpeleta, C., Martínez-Álvarez, R. M., Delgado, M. J., Isorna, E. and De Pedro, N.** (2010).  
613 Melatonin reduces locomotor activity and circulating cortisol in goldfish. *Horm. Behav.* **57**,  
614 323-329.

615 **Borrelli, F. and Izzo, A. A.** (2009). Role of acylethanolamides in the gastrointestinal tract with  
616 special reference to food intake and energy balance. *Best Pract. Res. Clin. Endocrinol. Metab.*  
617 **23**, 33-49.

618 **Cadas, H., Di Tomaso, E. and Piomelli, D.** (1997). Occurrence and biosynthesis of  
619 endogenous cannabinoid precursor, N-arachidonoyl phosphatidylethanolamine, in rat brain. *J.*  
620 *Neurosci.* **17**, 1226-1242.

621 **Campolongo, P., Roozendaal, B., Trezza, V., Cuomo, V., Astarita, G., Fu, J., McGaugh, J.**  
622 **L. and Piomelli, D.** (2009). Fat-induced satiety factor oleoylethanolamide enhances memory  
623 consolidation. *Proc. Natl. Acad. Sci. U S A* **106**, 8027-8031.

624 **Cani, P. D., Montoya, M. L., Neyrinck, A. M., Delzenne, N. M. and Lambert, D. M.** (2004).  
625 Potential modulation of plasma ghrelin and glucagon-like peptide-1 by anorexigenic  
626 cannabinoid compounds, SR141716A (rimonabant) and oleoylethanolamide. *Br. J. Nutr.* **92**,  
627 757-761.

628 **Carmona-Antoñanzas, G., Tocher, D. R., Martínez-Rubio, L. and Leaver, M. J.** (2014).  
629 Conservation of lipid metabolic gene transcriptional regulatory networks in fish and mammals.  
630 *Gene* **534**, 1-9.

- 631 **De Pedro, N. and Björnsson, T.** (2001). Regulation of food intake by neuropeptides and  
632 hormones. In *Food intake in fish* (ed. D. Houlihan, T. Boujard and M. Jobling), pp. 267-296.  
633 Oxford: Blackwell Science Ltd.
- 634 **De Pedro, N., Delgado, M. J. and Alonso-Bedate, M.** (2001). Fasting and hypothalamic  
635 catecholamines in goldfish. *J. Fish Biol.* **58**, 1404-1413.
- 636 **De Pedro, N., Martínez-Álvarez, R. and Delgado, M. J.** (2006). Acute and chronic leptin  
637 reduces food intake and body weight in goldfish (*Carassius auratus*). *J. Endocrinol.* **188**, 513-  
638 520.
- 639 **De Pedro, N., Martínez-Álvarez, R. M. and Delgado, M. J.** (2008). Melatonin reduces body  
640 weight in goldfish (*Carassius auratus*): effects on metabolic resources and some feeding  
641 regulators. *J. Pineal Res.* **45**, 32-39.
- 642 **De Pedro, N., Delgado, M. J., Pinillos, M. L. and Alonso-Bedate, M.** (1998a). Alpha1-  
643 adrenergic and dopaminergic receptors are involved in the anorectic effect of corticotropin-  
644 releasing factor in goldfish. *Life Sci.* **62**, 1801-1808.
- 645 **De Pedro, N., Pinillos, M. L., Valenciano, A. I., Alonso-Bedate, M. and Delgado, M. J.**  
646 (1998b). Inhibitory effect of serotonin on feeding behavior in goldfish: involvement of CRF.  
647 *Peptides* **19**, 505-511.
- 648 **Fredriksson, R., Höglund, P. J., Gloriam, D. E., Lagerström, M. C. and Schiöth, H. B.**  
649 (2003). Seven evolutionarily conserved human rhodopsin G protein-coupled receptors lacking  
650 close relatives. *FEBS Lett.* **554**, 381-388.
- 651 **Fu, J., Oveisi, F., Gaetani, S., Lin, E. and Piomelli, D.** (2005). Oleoylethanolamide, an  
652 endogenous PPAR-alpha agonist, lowers body weight and hyperlipidemia in obese rats.  
653 *Neuropharmacology* **48**, 1147-1153.
- 654 **Fu, J., Astarita, G., Gaetani, S., Kim, J., Cravatt, B. F., Mackie, K. and Piomelli, D.** (2007).  
655 Food intake regulates oleoylethanolamide formation and degradation in the proximal small  
656 intestine. *J. Biol. Chem.* **282**, 1518-1528.
- 657 **Fu, J., Dipatrizio, N. V., Guijarro, A., Schwartz, G. J., Li, X., Gaetani, S., Astarita, G. and**  
658 **Piomelli, D.** (2011). Sympathetic activity controls fat-induced oleoylethanolamide signaling in  
659 small intestine. *J. Neurosci.* **31**, 5730-5736.
- 660 **Fu, J., Gaetani, S., Oveisi, F., Lo Verme, J., Serrano, A., Rodríguez De Fonseca, F.,**  
661 **Rosengarth, A., Luecke, H., Di Giacomo, B., Tarzia, G. et al.** (2003). Oleoylethanolamide  
662 regulates feeding and body weight through activation of the nuclear receptor PPAR-alpha.  
663 *Nature* **425**, 90-93.
- 664 **Gaetani, S., Oveisi, F. and Piomelli, D.** (2003). Modulation of meal pattern in the rat by the  
665 anorexic lipid mediator oleoylethanolamide. *Neuropsychopharmacol.* **28**, 1311-1316.
- 666 **Gaetani, S., Fu, J., Cassano, T., Dipasquale, P., Romano, A., Righetti, L., Cianci, S.,**  
667 **Laconca, L., Giannini, E., Scaccianoce, S. et al.** (2010). The fat-induced satiety factor

- 668 oleoylethanolamide suppresses feeding through central release of oxytocin. *J. Neurosci.* **30**,  
669 8096-8101.
- 670 **Gau, P., Poon, J., Ufret-Vincenty, C., Snelson, C. D., Gordon, S. E., Raible, D. W. and**  
671 **Dhaka, A.** (2013). The zebrafish ortholog of TRPV1 is required for heat-induced locomotion. *J.*  
672 *Neurosci.* **33**, 5249-5260.
- 673 **González-Yanes, C., Serrano, A., Bermúdez-Silva, F. J., Hernández-Dominguez, M., Páez-**  
674 **Ochoa, M. A., Rodríguez de Fonseca, F. and Sánchez-Margalet, V.** (2005).  
675 Oleoylethanolamide impairs glucose tolerance and inhibits insulin-stimulated glucose uptake in  
676 rat adipocytes through p38 and JNK MAPK pathways. *Am. J. Physiol.-Endoc. M.* **289**, E923-  
677 E929.
- 678 **Guzmán, M., Lo Verme, J., Fu, J., Oveisi, F., Blázquez, C. and Piomelli, D.** (2004).  
679 Oleoylethanolamide stimulates lipolysis by activating the nuclear receptor peroxisome  
680 proliferator-activated receptor alpha (PPAR-alpha). *J. Biol. Chem.* **279**, 27849-27854.
- 681 **Hoskins, L. J. and Volkoff, H.** (2012). The comparative endocrinology of feeding in fish:  
682 insights and challenges. *Gen. Comp. Endocrinol.* **176**, 327-335.
- 683 **Izzo, A. A., Piscitelli, F., Capasso, R., Marini, P., Cristino, L., Petrosino, S. and Di Marzo,**  
684 **V.** (2010). Basal and fasting/refeeding-regulated tissue levels of endogenous PPAR-alpha  
685 ligands in Zucker rats. *Obesity* **18**, 55-62.
- 686 **Jönsson, E.** (2013). The role of ghrelin in energy balance regulation in fish. *Gen. Comp.*  
687 *Endocrinol.* **187**, 79-85.
- 688 **Kuz'mina, V. V. and Garina, D. V.** (2013). The effects of peripherally injected serotonin on  
689 feeding and locomotor activities in carp *Cyprinus carpio* L. *Inland Water Biology* **6**, 62-69.
- 690 **Librán-Pérez, M., Polakof, S., López-Patiño, M. A., Míguez, J. M. and Soengas, J. L.**  
691 (2012). Evidence of a metabolic fatty acid-sensing system in the hypothalamus and Brockmann  
692 bodies of rainbow trout: implications in food intake regulation. *Am. J. Physiol. Regul. Integr.*  
693 *Comp. Physiol.* **302**, R1340-1350.
- 694 **Librán-Pérez, M., Otero-Rodiño, C., López-Patiño, M. A., Míguez, J. M. and Soengas, J.**  
695 **L.** (2014). Central administration of oleate or octanoate activates hypothalamic fatty acid  
696 sensing and inhibits food intake in rainbow trout. *Physiol. Behav.* **129**, 272-279.
- 697 **Lin, X., Volkoff, H., Narnaware, Y., Bernier, N. J., Peyon, P. and Peter, R. E.** (2000). Brain  
698 regulation of feeding behavior and food intake in fish. *Comp. Biochem. Physiol. A Mol. Integr.*  
699 *Physiol.* **126**, 415-434.
- 700 **Livak, K. J. and Schmittgen, T. D.** (2001). Analysis of relative gene expression data using  
701 real-time quantitative PCR and the  $2(-\Delta\Delta C(T))$ . *Methods* **25**, 402-408.
- 702 **Lo Verme, J., Gaetani, S., Fu, J., Oveisi, F., Burton, K. and Piomelli, D.** (2005). Regulation  
703 of food intake by oleoylethanolamide. *Cell. Mol. Life Sci.* **62**, 708-716.

- 704 **Lowry, O. H., Rosebrough, N. J., Farr, A. L. and Randall, R. J.** (1951). Protein  
705 measurement with the folin phenol reagent. *J. Biol. Chem.* **193**, 265-275.
- 706 **Mimeault, C., Trudeau, V. L. and Moon, T. W.** (2006). Waterborne gemfibrozil challenges  
707 the hepatic antioxidant defense system and down-regulates peroxisome proliferator-activated  
708 receptor beta (PPARbeta) mRNA levels in male goldfish (*Carassius auratus*). *Toxicology* **228**,  
709 140-150.
- 710 **Nielsen, M. J., Petersen, G., Astrup, A. and Hansen, H. S.** (2004). Food intake is inhibited by  
711 oral oleoylethanolamide. *J. Lipid. Res.* **45**, 1027-1029.
- 712 **Overton, H. A., Babbs, A. J., Doel, S. M., Fyfe, M. C., Gardner, L. S., Griffin, G., Jackson,**  
713 **H. C., Procter, M. J., Rasamison, C. M., Tang-Christensen, M. et al.** (2006).  
714 Deorphanization of a G protein-coupled receptor for oleoylethanolamide and its use in the  
715 discovery of small-molecule hypophagic agents. *Cell Metab.* **3**, 167-175.
- 716 **Pavón, F. J., Serrano, A., Romero-Cuevas, M., Alonso, M. and Rodríguez de Fonseca, F.**  
717 (2010). Oleoylethanolamide: a new player in peripheral control of energy metabolism.  
718 Therapeutic implications. *Drug Discov. Today: Disease Mechanisms* **7**, e175-e183.
- 719 **Pérez-Jiménez, A., Cardenete, G., Hidalgo, M. C., García-Alcázar, A., Abellán, E. and**  
720 **Morales, A. E.** (2012). Metabolic adjustments of Dentex dentex to prolonged starvation and  
721 refeeding. *Fish Physiol. Biochem.* **38**, 1145-1157.
- 722 **Petersen, G., Sorensen, C., Schmid, P. C., Artmann, A., Tang-Christensen, M., Hansen, S.**  
723 **H., Larsen, P. J., Schmid, H. H. and Hansen, H. S.** (2006). Intestinal levels of anandamide  
724 and oleoylethanolamide in food-deprived rats are regulated through their precursors. *Biochim.*  
725 *Biophys. Acta* **1761**, 143-150.
- 726 **Piccinetti, C. C., Migliarini, B., Petrosino, S., Di Marzo, V. and Carnevali, O.** (2010).  
727 Anandamide and AM251, via water, modulate food intake at central and peripheral level in fish.  
728 *Gen. Comp. Endocrinol.* **166**, 259-267.
- 729 **Piomelli, D.** (2013). A fatty gut feeling. *Trends Endocrinol. Metab.* **7**, 332-341.
- 730 **Polakof, S., Panserat, S., Soengas, J. L. and Moon, T. W.** (2012). Glucose metabolism in  
731 fish: a review. *J. Comp. Physiol. B* **182**, 1015-1045.
- 732 **Proulx, K., Cota, D., Castaneda, T. R., Tschop, M. H., D'Alessio, D. A., Tso, P., Woods, S.**  
733 **C. and Seeley, R. J.** (2005). Mechanisms of oleoylethanolamide-induced changes in feeding  
734 behavior and motor activity. *Am. J. Physiol. Regul. Integr. Comp. Physiol.* **289**, R729-737.
- 735 **Rodríguez de Fonseca, F., Navarro, M., Gómez, R., Escuredo, L., Nava, F., Fu, J., Murillo-**  
736 **Rodríguez, E., Giuffrida, A., Lo Verme, J., Gaetani, S. et al.** (2001). An anorexic lipid  
737 mediator regulated by feeding. *Nature* **414**, 209-212.
- 738 **Romano, A., Potes, C. S., Tempesta, B., Cassano, T., Cuomo, V., Lutz, T. and Gaetani, S.**  
739 (2013). Hindbrain noradrenergic input to the hypothalamic PVN mediates the activation of

- 740 oxytocinergic neurons induced by the satiety factor oleoylethanolamide. *Am. J. Physiol.*  
741 *Endocrinol. Metab.* **305**, E1266-E1273.
- 742 **Sarro-Ramírez, A., Sánchez-López, D., Tejada-Padrón, A., Frías, C., Zaldivar-Rae, J. and**  
743 **Murillo-Rodríguez, E.** (2013). Brain molecules and appetite: the case of oleoylethanolamide.  
744 *Cent. Nerv. Syst. Agents Med. Chem.* **13**, 88-91.
- 745 **Serrano, A., Pavón, F. J., Tovar, S., Casanueva, F., Señaris, R., Diéguez, C. and Rodríguez**  
746 **de Fonseca, F.** (2011). Oleoylethanolamide: effects on hypothalamic transmitters and gut  
747 peptides regulating food intake. *Neuropharmacology* **60**, 593-601.
- 748 **Thabuis, C., Tissot-Favre, D., Bezelgues, J. B., Martin, J. C., Cruz-Hernandez, C., Dionisi,**  
749 **F. and Destailats, F.** (2008). Biological functions and metabolism of oleoylethanolamide.  
750 *Lipids* **43**, 887-894.
- 751 **Tinoco, A. B., Nisembaum, L. G., Isorna, E., Delgado, M. J. and De Pedro, N.** (2012).  
752 Leptins and leptin receptor expression in the goldfish (*Carassius auratus*). Regulation by food  
753 intake and fasting/overfeeding conditions. *Peptides* **34**, 329-335.
- 754 **Valenti, M., Cottone, E., Martinez, R., De Pedro, N., Rubio, M., Viveros, M. P., Franzoni,**  
755 **M. F., Delgado, M. J. and Di Marzo, V.** (2005). The endocannabinoid system in the brain of  
756 *Carassius auratus* and its possible role in the control of food intake. *J. Neurochem.* **95**, 662-672.
- 757 **Vivas, Y., Azpeleta, C., Feliciano, A., Velarde, E., Isorna, E., Delgado, M. J. and De Pedro,**  
758 **N.** (2011). Time-dependent effects of leptin on food intake and locomotor activity in goldfish.  
759 *Peptides* **32**, 989-995.
- 760 **Volkoff, H., Unniappan, S. and Kelly, S.P.** (2009) The endocrine regulation of food intake. In  
761 *Fish neuroendocrinology* (ed. N. J. Bernier, G. Van der Kraak, A. P. Farrel, and C. J. Brauner),  
762 pp. 421-265. London: Academic Press Ltd.
- 763 **Wang, X., Miyares, R. L. and Ahern, G. P.** (2005). Oleoylethanolamide excites vagal sensory  
764 neurones, induces visceral pain and reduces short-term food intake in mice via capsaicin  
765 receptor TRPV1. *J. Physiol.* **564**, 541-547.
- 766 **Wilson, A. M. and McLaughlin, R.** (2010). Foraging behaviour and brain morphology in  
767 recently emerged brook charr, *Salvelinus fontinalis*. *Behav. Ecol. Sociobiol.* **64**, 1905-1914.
- 768 **Zheng, J. L., Luo, Z., Zhu, Q. L., Tan, X. Y., Chen, Q. L., Sun, L. D. and Hu, W.** (2013).  
769 Molecular cloning and expression pattern of 11 genes involved in lipid metabolism in yellow  
770 catfish *Pelteobagrus fulvidraco*. *Gene* **531**, 53-63.

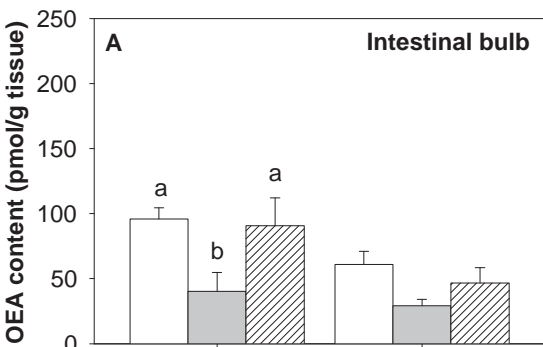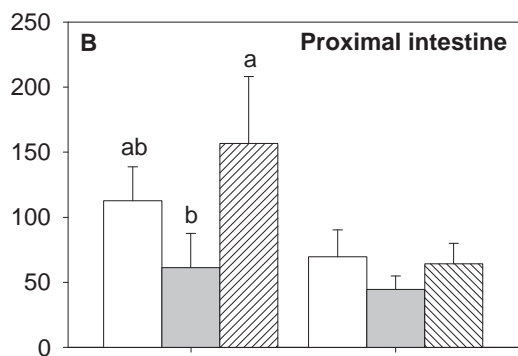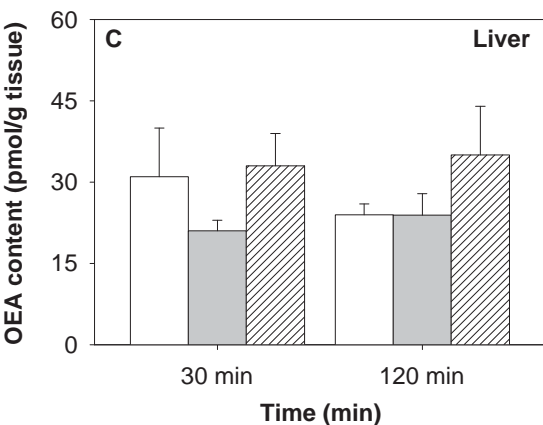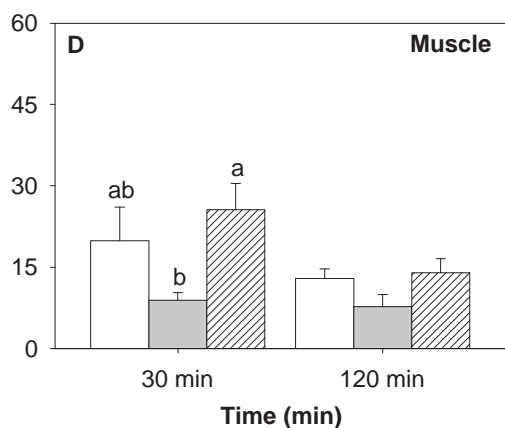

Legend: Fed (white bar), Fasted (gray bar), Fasted+refed (hatched bar)

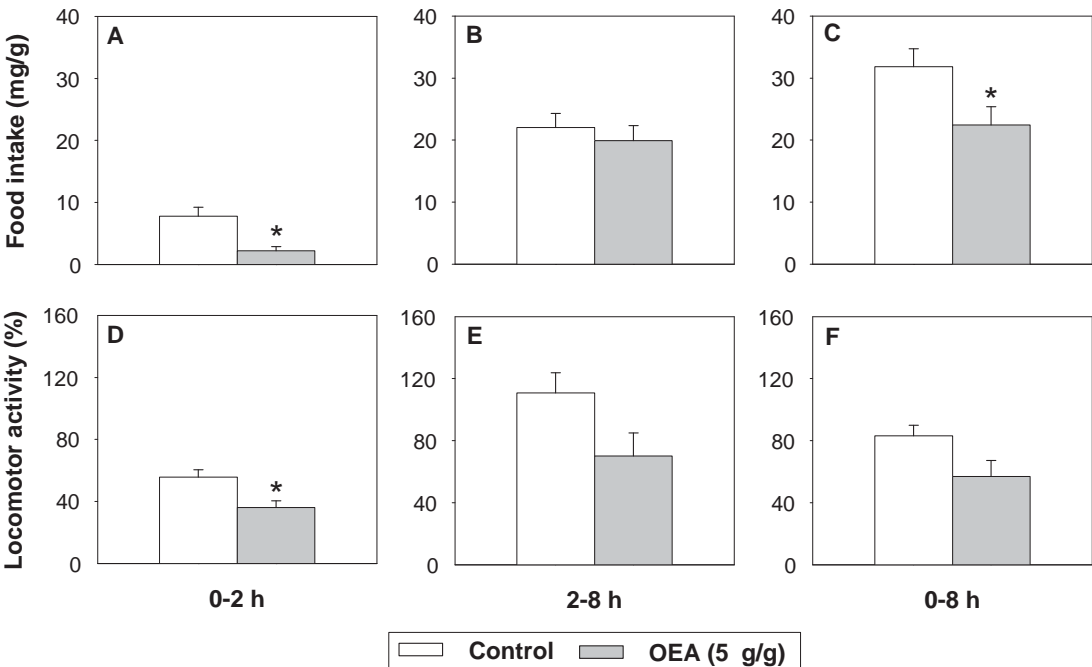



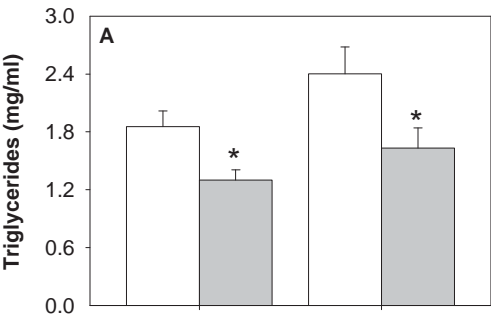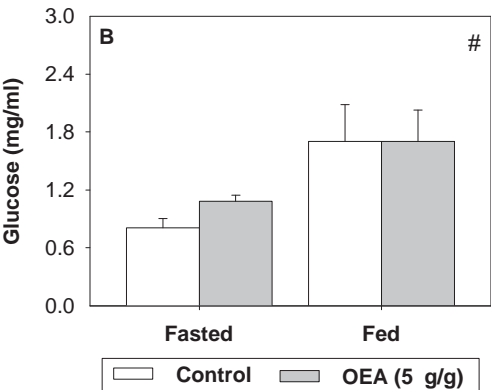

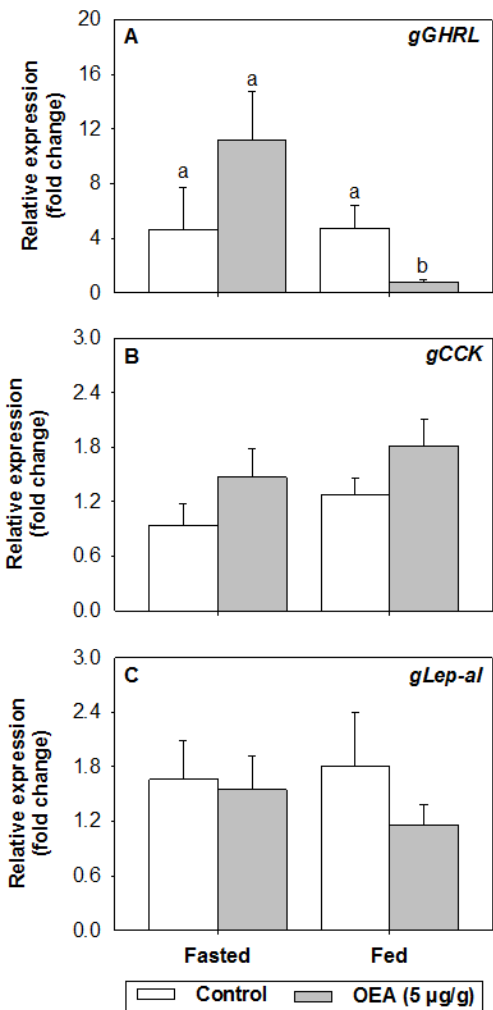

## FIGURE LEGENDS

**Figure 1. Effect of feeding conditions on OEA content in goldfish peripheral tissues.** OEA content in fed, fasted (48-h) and fasted (48-h) + re-fed fish 30 and 120 min after feeding time in: (A) intestinal bulb, (B) proximal intestine, (C) liver and (D) muscle. Data are expressed as mean  $\pm$  s.e.m. Different letters indicate significant differences ( $p < 0.05$ ) among experimental groups at the same time period.

**Figure 2. Effect of OEA on goldfish food intake and locomotor activity.** Food intake (upper panels) and locomotor activity (lower panels) 0-2 (A and D), 2-8 (B and E) and 0-8 (C and F) h after IP administration of vehicle alone (control group) or containing OEA (5  $\mu\text{g/g}$  b.w.). Data are expressed as mean  $\pm$  s.e.m. \*,  $p < 0.05$  vs control group.

**Figure 3. Effect of OEA on goldfish plasma triglycerides and glucose.** Plasma levels of triglycerides (A) and glucose (B) 2 h after IP administration of vehicle alone (control group) or containing OEA (5  $\mu\text{g/g}$ ) in fed and 24-h food-deprived goldfish. Data are expressed as mean  $\pm$  s.e.m. \*,  $p < 0.05$  differences between control and OEA treatments; #,  $p < 0.05$  differences between fasted and fed groups.

**Figure 4. Effect of OEA on goldfish peripheral feeding regulators expression.** The relative expression of (A) *ghrelin* (*gGHRL*) and (B) *cholecystokinin* (*gCCK*) in intestinal bulb; and (C) *leptin-a1* (*gLep-a1*) in liver 2 h after IP administration of vehicle alone (control group) or containing OEA (5  $\mu\text{g/g}$ ) in fed and 24-h food-deprived goldfish. Data are expressed as mean  $\pm$  s.e.m. Different letters indicate significant differences ( $p < 0.05$ ).

## TABLES

Table 1. OEA content (pmol/g tissue) in goldfish brain 30 and 120 min post-feeding

| Tissue        | Post-feeding time (min) | Fed                 | Fasted (48-h)    | Fasted + re-fed     |
|---------------|-------------------------|---------------------|------------------|---------------------|
| Hypothalamus  | 30                      | $47.3 \pm 3.0$      | $49.5 \pm 1.6$   | $41.4 \pm 2.7$      |
|               | 120                     | $43.1 \pm 2.3$      | $42.2 \pm 2.7$   | $47.0 \pm 5.7$      |
| Telencephalon | 30                      | $20.8 \pm 1.8^a$    | $28.4 \pm 2.1^b$ | $26.0 \pm 2.2^{ab}$ |
|               | 120                     | $21.0 \pm 1.7^{ab}$ | $16.6 \pm 3.1^b$ | $26.0 \pm 2.0^a$    |
| Brainstem     | 30                      | $130.5 \pm 12.1$    | $123.7 \pm 9.1$  | $100.5 \pm 5.1$     |
|               | 120                     | $96.8 \pm 13.3$     | $115.4 \pm 9.2$  | $99.4 \pm 9.5$      |

Data are expressed as mean  $\pm$  s.e.m. Different letters indicate significant differences ( $p < 0.05$ ) among experimental groups at the same time period.

Table 2. Relative expression of feeding regulators in goldfish hypothalamus 2 h after IP administration of OEA (5  $\mu$ g/g)

| Gene            | Fasted (24-h)   |                 | Fed             |                 |
|-----------------|-----------------|-----------------|-----------------|-----------------|
|                 | Control         | OEA             | Control         | OEA             |
| <i>gLep-aI</i>  | $1.04 \pm 0.13$ | $1.49 \pm 0.29$ | $1.08 \pm 0.06$ | $1.24 \pm 0.12$ |
| <i>gLep-aII</i> | $1.07 \pm 0.18$ | $1.66 \pm 0.33$ | $1.29 \pm 0.22$ | $1.23 \pm 0.09$ |
| <i>gOrexin</i>  | $1.66 \pm 0.49$ | $1.70 \pm 0.44$ | $2.28 \pm 0.48$ | $3.81 \pm 0.54$ |
| <i>gNPY</i>     | $3.31 \pm 1.36$ | $5.32 \pm 2.51$ | $1.07 \pm 0.41$ | $1.67 \pm 0.41$ |

Data are expressed as mean  $\pm$  s.e.m. Goldfish leptin-aI (*gLep-aI*), leptin-aII (*gLep-aII*), orexin (*gOrexin*) and neuropeptide Y (*gNPY*).

Table 3. Brain changes in monoaminergic system  
in goldfish 2 h after IP administration of OEA (5 µg/g)

|                       | Fasted (24-h) |               | Fed           |                | Stat |
|-----------------------|---------------|---------------|---------------|----------------|------|
|                       | Control       | OEA           | Control       | OEA            |      |
| Hypothalamus          |               |               |               |                |      |
| NA (pmol/mg prot)     | 50.95 ± 3.37  | 52.79 ± 2.97  | 62.66 ± 7.53  | 68.77 ± 6.34   | #    |
| DA (pmol/mg prot)     | 56.45 ± 3.44  | 43.40 ± 1.24  | 52.96 ± 4.53  | 61.01 ± 10.24  | -    |
| DOPAC (pmol/mg prot)  | 1.75 ± 0.19   | 1.97 ± 0.45   | 1.95 ± 0.30   | 1.71 ± 0.20    | -    |
| DOPAC/DA (%)          | 3.13 ± 0.31   | 4.46 ± 0.98   | 3.98 ± 0.76   | 3.95 ± 1.38    | -    |
| 5-HT (pmol/mg prot)   | 116.35 ± 8.56 | 82.45 ± 12.00 | 109.38 ± 9.09 | 136.31 ± 17.51 | -    |
| 5-HIAA (pmol/mg prot) | 21.76 ± 2.06  | 21.93 ± 3.28  | 23.58 ± 1.72  | 28.34 ± 2.54   | -    |
| 5-HIAA/5-HT (%)       | 18.95 ± 1.75  | 24.41 ± 2.48  | 21.85 ± 1.00  | 22.16 ± 2.26   | -    |
| Telencephalon         |               |               |               |                |      |
| NA (pmol/mg prot)     | 46.35 ± 3.68  | 61.71 ± 5.05  | 65.08 ± 6.51  | 74.29 ± 6.10   | * #  |
| DA (pmol/mg prot)     | 17.49 ± 5.86  | 12.24 ± 1.35  | 12.60 ± 1.30  | 14.84 ± 1.33   | -    |
| 5-HT (pmol/mg prot)   | 49.30 ± 11.84 | 38.69 ± 1.70  | 43.59 ± 3.17  | 41.92 ± 2.84   | -    |
| 5-HIAA (pmol/mg prot) | 12.42 ± 2.01  | 13.05 ± 0.72  | 15.03 ± 1.81  | 18.12 ± 1.25   | #    |
| 5-HIAA/5-HT (%)       | 27.10 ± 1.78  | 33.93 ± 2.08  | 34.70 ± 3.48  | 43.70 ± 3.48   | * #  |

Data are expressed as mean ± s.e.m. Statistics (Stat): \*,  $p < 0.05$  differences between control and OEA treatment; #,  $p < 0.05$  differences between fasted and fed groups. Noradrenaline (NA), dopamine (DA), 3,4-dihydroxyphenylacetic acid (DOPAC), serotonin (5-HT), 5-hydroxyindole acetic acid (5-HIAA).
